# Supplementary material for: Long-term Relapse of Type 2 Diabetes After Roux-en-Y Gastric Bypass: Prediction and Clinical Relevance
Source: Oxford University Press journal article supplement (doi:10.2337/dc18-0567), 2018-08-06

SUPPLEMENTARY DATA

**Principal investigators**

**Pitié Salpêtrière Hospital:** Karine Clément, Judith Aron-Wisnewsky, Christine Poitou-Bernet, Jean-Michel Oppert

**Louis-Mourrier Hospital:** Séverine Ledoux, Muriel Coupaye

**Rome Hospital :** Geltrude Mingrone, Simona Panunzi

**Leipzig Hospital :** Rima Chakaroun, Matthias Blüher, Michael Stumvoll

SUPPLEMENTARY DATA

**Supplementary Table S1.** Prevalence of anxiety and depression 5-years after surgery among our three trajectory-groups, according to the HAD anxiety score, the HAD depression score, and the BDI depression score. Chi-square test was used to asses between remission status differences.

|                                                          | 5y-DR     | 5y-Relapse | 5y-NDR    | P-value |
|----------------------------------------------------------|-----------|------------|-----------|---------|
| <b>HAD anxiety scores (3)</b>                            |           |            |           |         |
| <i>Number of participants</i>                            | 45        | 14         | 27        | -       |
| No anxiety (score $\leq 7$ ) – n (%)                     | 27 (60.0) | 7 (50.0)   | 17 (63.0) | 0.92    |
| Doubt ( $8 \leq$ score $\leq 10$ ) – n (%)               | 7 (15.6)  | 5 (35.7)   | 5 (18.5)  | 0.43    |
| Overt anxiety (score $\geq 11$ ) – n (%)                 | 11 (24.4) | 2 (14.3)   | 5 (18.5)  | 0.77    |
| <b>HAD depression scores (3)</b>                         |           |            |           |         |
| <i>Number of participants</i>                            | 45        | 14         | 27        | -       |
| No anxiety (score $\leq 7$ ) – n (%)                     | 30 (66.7) | 13 (92.9)  | 23 (85.2) | 0.69    |
| Doubt ( $8 \leq$ score $\leq 10$ ) – n (%)               | 10 (22.2) | 0 (0.0)    | 3 (11.1)  | 0.16    |
| Overt anxiety (score $\geq 11$ ) – n (%)                 | 5 (11.1)  | 1 (7.1)    | 1 (3.7)   | 0.58    |
| <b>BDI depression scores (4)</b>                         |           |            |           |         |
| <i>Number of participants</i>                            | 34        | 12         | 21        |         |
| No depression (score $\leq 3$ ) – n (%)                  | 19 (55.9) | 7 (58.3)   | 9 (42.9)  | 0.84    |
| Mild depression ( $4 \leq$ score $\leq 7$ ) – n (%)      | 7 (20.6)  | 2 (16.7)   | 7 (33.3)  | 0.62    |
| Moderate depression ( $8 \leq$ score $\leq 15$ ) – n (%) | 5 (14.7)  | 3 (25.0)   | 4 (19.0)  | 0.80    |
| Severe depression (score $\geq 16$ ) – n (%)             | 3 (8.8)   | 0 (0.0)    | 1 (4.8)   | 0.55    |

SUPPLEMENTARY DATA

**Supplementary Table S2. DiaRem, Ad-DiaRem and 5y-Ad-DiaRem performances in the two French cohorts, as well as the performances of the 5y-Ad-DiaRem in the two European validations cohorts**

In the confusion matrixes, the true condition was non-remission 5-years post-RYGB, and the predicted conditions was set as if a patient's score value was over the score's fixed threshold (>6 for the DiaRem (1), ≥10 for the Ad-DiaRem (2), and >11 for the 5y-Ad-DiaRem).

|                           | BARICAN cohort (n = 175) |           |                | French cohort (n = 54) |           |                | Italian cohort (n=20) | German cohort (n=50) |
|---------------------------|--------------------------|-----------|----------------|------------------------|-----------|----------------|-----------------------|----------------------|
|                           | DiaRem                   | Ad-DiaRem | 5y-Ad-DiaRem   | DiaRem                 | Ad-DiaRem | 5y-Ad-DiaRem   | 5y-Ad-DiaRem          | 5y-Ad-DiaRem         |
| True positives – n (%)    | 60 (34)                  | 58 (33)   | <b>73 (42)</b> | 22 (41)                | 20 (37)   | <b>23 (43)</b> | <b>10 (50)</b>        | <b>21 (42)</b>       |
| True negatives – n (%)    | 76 (43)                  | 79 (45)   | <b>76 (43)</b> | 22 (41)                | 24 (44)   | <b>25 (46)</b> | <b>4 (20)</b>         | <b>24 (48)</b>       |
| False positives – n (%)   | 18 (10)                  | 15 (9)    | <b>18 (10)</b> | 6 (11)                 | 4 (7)     | <b>3 (6)</b>   | <b>2 (10)</b>         | <b>3 (6)</b>         |
| False negatives – n (%)   | 21 (12)                  | 23 (13)   | <b>8 (5)</b>   | 4 (7)                  | 6 (11)    | <b>3 (6)</b>   | <b>4 (20)</b>         | <b>2 (4)</b>         |
| Positive predictive value | 77%                      | 79%       | <b>80%</b>     | 79%                    | 83%       | <b>88%</b>     | <b>83%</b>            | <b>87%</b>           |
| Negative predictive value | 78%                      | 77%       | <b>90%</b>     | 85%                    | 80%       | <b>89%</b>     | <b>50%</b>            | <b>92%</b>           |
| Sensitivity               | 74%                      | 72%       | <b>90%</b>     | 85%                    | 77%       | <b>88%</b>     | <b>71%</b>            | <b>91%</b>           |
| Specificity               | 81%                      | 84%       | <b>81%</b>     | 79%                    | 86%       | <b>89%</b>     | <b>67%</b>            | <b>88%</b>           |
| Accuracy                  | 79%                      | 78%       | <b>85%</b>     | 81%                    | 81%       | <b>89%</b>     | <b>70%</b>            | <b>90%</b>           |
| AUC                       | 81%                      | 84%       | <b>90%</b>     | 88%                    | 89%       | <b>96%</b>     | <b>85%</b>            | <b>92%</b>           |

SUPPLEMENTARY DATA

**Supplementary Table S3. Unstandardized odd-ratios evaluating the risk of undergoing 5-year Relapse and/or remain in non-remission. Both sex and age were included in the regression model.**

\* The group of patients was used as reference.

† Evolutions during the first year were calculated using the following formula: [(1-year value) – (Baseline value)] / (Baseline value) x 100.

OR odd-ratio, CI confidence interval

|                                                             | Risk of 5y-Relapse compared to 5y-DR* |             |      | Risk or 5y-NDR compared to 5y-Relapse* |             |       | Risk of 5y-NDR compared to 5y-DR* |              |        |
|-------------------------------------------------------------|---------------------------------------|-------------|------|----------------------------------------|-------------|-------|-----------------------------------|--------------|--------|
|                                                             | OR                                    | 95% CI      | p    | OR                                     | 95% CI      | p     | OR                                | 95% CI       | p      |
| <b>Baseline variables</b>                                   |                                       |             |      |                                        |             |       |                                   |              |        |
| Fasting glucose (mmol/L)                                    | 1.07                                  | [0.88;1.28] | 0.55 | 1.12                                   | [0.94;1.36] | 0.30  | 1.29                              | [1.12;1.51]  | 0.002  |
| HbA1C (%)                                                   | 1.17                                  | [0.8;1.69]  | 0.48 | 2.39                                   | [1.5;4.23]  | 0.004 | 3.27                              | [2.18;5.29]  | <0.001 |
| Number of anti-diabetic treatments                          | 1.81                                  | [1.18;2.84] | 0.04 | 3.54                                   | [1.86;7.76] | 0.002 | 3.70                              | [2.44;6.06]  | <0.001 |
| Age (years)                                                 | 1.00                                  | [0.96;1.04] | 0.94 | 1.08                                   | [1.03;1.15] | 0.02  | 1.06                              | [1.02;1.10]  | 0.004  |
| Type 2 diabetes duration (years)                            | 1.10                                  | [0.98;1.23] | 0.18 | 1.27                                   | [1.13;1.48] | 0.002 | 1.32                              | [1.21;1.47]  | <0.001 |
| <b>Kinetic variables (during the 1<sup>st</sup> year) †</b> |                                       |             |      |                                        |             |       |                                   |              |        |
| Weight lost (% baseline)                                    | 1.13                                  | [1.06;1.22] | 0.01 | 0.94                                   | [0.87;1]    | 0.13  | 1.08                              | [1.02;1.14]  | 0.01   |
| Fat mass lost (% baseline)                                  | 1.09                                  | [1.02;1.17] | 0.04 | 0.95                                   | [0.88;1.01] | 0.14  | 1.03                              | [0.99;1.07]  | 0.23   |
| Fat-free mass lost (% baseline)                             | 0.91                                  | [0.84;0.97] | 0.04 | 1.05                                   | [0.98;1.14] | 0.22  | 0.95                              | [0.91;0.99]  | 0.06   |
| Trunk-fat mass lost (% baseline)                            | 1.04                                  | [1.01;1.09] | 0.06 | 0.99                                   | [0.95;1.03] | 0.66  | 1.03                              | [1;1.06]     | 0.06   |
| <b>1-year variables</b>                                     |                                       |             |      |                                        |             |       |                                   |              |        |
| 1-year fasting glycaemia (mmol/L)                           | 1.33                                  | [0.8;2.19]  | 0.33 | 1.84                                   | [1.13;3.4]  | 0.07  | 2.03                              | [1.46;2.97]  | <0.001 |
| 1-year HbA1C (%)                                            | 1.02                                  | [0.44;2.26] | 0.95 | 9.00                                   | [3.04;36.2] | 0.002 | 5.32                              | [2.87;10.88] | <0.001 |
| 1-year number of anti-diabetic treatments                   | -                                     | -           | -    | -                                      | -           | -     | 25.82                             | [9.5;99.9]   | <0.001 |

SUPPLEMENTARY DATA

**Supplementary Table S4.** Comparison of the test cohort (BARICAN) and the French confirmation cohort from Louis-Mourier Hospital. Between cohorts comparisons were performed using Mann-Whitney tests for continuous variables and Chi-square test for categorical variables (noted \*).

|                                                               | Test cohort    | French confirmation cohort | p-value |
|---------------------------------------------------------------|----------------|----------------------------|---------|
| <b>Baseline characteristics</b>                               |                |                            |         |
| Number of patients                                            | 175            | 54                         |         |
| Male - n (%)                                                  | 39 (22.3%)     | 7 (13.0%)                  | 0.193*  |
| Age (years)                                                   | 48.26 ± 10.33  | 48.22 ± 9.38               | 0.976   |
| T2D duration (years)                                          | 6.75 ± 6.53    | 6.69 ± 6.92                | 0.954   |
| Body weight (kg)                                              | 128.92 ± 22.07 | 120.31 ± 21.97             | 0.013   |
| BMI (kg/m <sup>2</sup> )                                      | 47.37 ± 7.43   | 45.10 ± 6.18               | 0.043   |
| HbA1c (%)                                                     | 7.54 ± 1.56    | 7.65 ± 1.15                | 0.620   |
| Fasting glycemia (mmol/L)                                     | 7.88 ± 2.65    | 8.63 ± 3.03                | 0.081   |
| Number of Anti-T2D drug(s) - n (%)                            |                |                            | 0.796*  |
| 0                                                             | 33 (18.9%)     | 7 (13.0%)                  |         |
| 1                                                             | 46 (26.3%)     | 18 (33.3%)                 |         |
| 2                                                             | 53 (30.3%)     | 17 (31.5%)                 |         |
| 3                                                             | 32 (18.3%)     | 9 (16.7%)                  |         |
| >3                                                            | 11 (6.3%)      | 3 (5.6%)                   |         |
| <b>Post-operative comparisons</b>                             |                |                            |         |
| Body weight loss during the first year (% baseline)           | -26.93 ± 7.61  | -28.96 ± 7.09              | 0.082   |
| Body weight loss during the 5 years of follow-up (% baseline) | -24.40 ± 10.42 | -28.08 ± 8.00              | 0.018   |
| 5-years T2D remission status                                  |                |                            | 0.202*  |
| 5y-DR                                                         | 94 (53.7%)     | 28 (51.9%)                 |         |
| 5y-Relapse                                                    | 27 (15.4%)     | 4 (7.4%)                   |         |
| 5y-NDR                                                        | 54 (30.9%)     | 22 (40.7%)                 |         |
| 1-year T2D remission status                                   |                |                            | 0.929*  |
| 1y-DR                                                         | 66 (37.7%)     | 21 (38.9%)                 |         |
| 1y-PDR                                                        | 40 (22.9%)     | 11 (20.4%)                 |         |
| 1y-NDR                                                        | 69 (39.4%)     | 22 (40.7%)                 |         |

SUPPLEMENTARY DATA

**Supplementary Table S5.** Comparison of the test cohort (BARICAN) and the Italian confirmation cohort from Geltrude Mingrone’s department (5). Between cohorts comparisons were performed using Mann-Whitney tests for continuous variables and Chi-square test for categorical variables (noted \*).

|                                                               | Test cohort    | Italian confirmation cohort | p       |
|---------------------------------------------------------------|----------------|-----------------------------|---------|
| <b>Baseline characteristics</b>                               |                |                             |         |
| Number of patients                                            | 175            | 20                          |         |
| Male - n (%)                                                  | 39 (22.3%)     | 12 (60.0%)                  | 0.001*  |
| Age (years)                                                   | 48.26 ± 10.33  | 43.90 ± 7.57                | 0.068   |
| T2D duration (years)                                          | 6.75 ± 6.53    | 6.05 ± 1.15                 | 0.636   |
| Body weight (kg)                                              | 128.92 ± 22.07 | 129.84 ± 22.58              | 0.861   |
| BMI (kg/m <sup>2</sup> )                                      | 47.37 ± 7.43   | 44.85 ± 5.16                | 0.143   |
| HbA1c (%)                                                     | 7.54 ± 1.56    | 8.55 ± 1.40                 | 0.006   |
| Fasting glycemia (mmol/L)                                     | 7.88 ± 2.65    | 9.55 ± 3.35                 | 0.010   |
| Number of Anti-T2D drug(s) - n (%)                            |                |                             | <0.001* |
| 0                                                             | 33 (18.9%)     | 0 (0.0%)                    |         |
| 1                                                             | 46 (26.3%)     | 3 (15.0%)                   |         |
| 2                                                             | 53 (30.3%)     | 0 (0.0%)                    |         |
| 3                                                             | 32 (18.3%)     | 11 (55.0%)                  |         |
| >3                                                            | 11 (6.3%)      | 6 (30.0%)                   |         |
| <b>Post-operative comparisons</b>                             |                |                             |         |
| Body weight loss during the first year (% baseline)           | -26.93 ± 7.61  | -31.81 ± 7.72               | 0.007   |
| Body weight loss during the 5 years of follow-up (% baseline) | -24.40 ± 10.42 | -28.59 ± 7.26               | 0.090   |
| 5-years T2D remission status                                  |                |                             | 0.005*  |
| 5y-DR                                                         | 94 (53.7%)     | 5 (25.0%)                   |         |
| 5y-Relapse                                                    | 27 (15.4%)     | 9 (45.0%)                   |         |
| 5y-NDR                                                        | 54 (30.9%)     | 6 (30.0%)                   |         |
| 1-year T2D remission status                                   |                |                             | 0.349*  |
| 1y-DR                                                         | 66 (37.7%)     | 8 (40.0%)                   |         |
| 1y-PDR                                                        | 40 (22.9%)     | 5 (25.0%)                   |         |
| 1y-NDR                                                        | 69 (39.4%)     | 7 (35.0%)                   |         |

SUPPLEMENTARY DATA

**Supplementary Table S6.** Comparison of the test cohort (BARICAN) and the German confirmation cohort from Leipzig hospital. Between cohorts comparisons were performed using Mann-Whitney tests for continuous variables and Chi-square test for categorical variables (noted \*).

|                                                               | Test cohort    | German confirmation cohort | p-value |
|---------------------------------------------------------------|----------------|----------------------------|---------|
| <b>Baseline characteristics</b>                               |                |                            |         |
| Number of patients                                            | 175            | 50                         |         |
| Male - n (%)                                                  | 39 (22.3)      | 15 (30.0)                  | 0.348*  |
| Age (years)                                                   | 48.26 (10.33)  | 51.59 (9.55)               | 0.043   |
| T2D duration (years)                                          | 6.75 (6.53)    | 7.72 (8.12)                | 0.388   |
| Body weight (kg)                                              | 128.92 (22.07) | 143.53 (23.37)             | <0.001  |
| BMI (kg/m <sup>2</sup> )                                      | 47.37 (7.43)   | 50.42 (7.26)               | 0.011   |
| HbA1c (%)                                                     | 7.54 (1.56)    | 7.09 (1.83)                | 0.087   |
| Fasting glycemia (mmol/L)                                     | 7.88 (2.65)    | 8.37 (3.69)                | 0.300   |
| Number of Anti-T2D drug(s)<br>- n (%)                         |                |                            | 0.060*  |
| 0                                                             | 33 (18.9)      | 6 (12.0)                   |         |
| 1                                                             | 46 (26.3)      | 20 (40.0)                  |         |
| 2                                                             | 53 (30.3)      | 19 (38.0)                  |         |
| 3                                                             | 32 (18.3)      | 5 (10.0)                   |         |
| >3                                                            | 11 (6.3)       | 0 (0.0)                    |         |
| <b>Post-operative comparisons</b>                             |                |                            |         |
| Body weight loss during the first year (% baseline)           | -26.93 (7.61)  | -29.07 (8.72)              | 0.091   |
| Body weight loss during the 5 years of follow-up (% baseline) | -24.40 (10.42) | -28.74 (11.58)             | 0.012   |
| 5-years T2D remission status                                  |                |                            | 0.805*  |
| 5y-DR                                                         | 94 (53.7%)     | 27 (54.0)                  |         |
| 5y-Relapse                                                    | 27 (15.4%)     | 6 (12.0)                   |         |
| 5y-NDR                                                        | 54 (30.9%)     | 17 (34.0)                  |         |
| 1-year T2D remission status                                   |                |                            | 0.036*  |
| 1y-DR                                                         | 66 (37.7%)     | 28 (56.0)                  |         |
| 1y-PDR                                                        | 40 (22.9%)     | 5 (10.0)                   |         |
| 1y-NDR                                                        | 69 (39.4%)     | 17 (34.0)                  |         |

SUPPLEMENTARY DATA

**Supplementary Table S7. Evolution of clinical parameters before, 1-year and 5-years after RYGB for patients who maintained their T2D.**

Data are presented as mean ± standard deviation unless stated otherwise. Between time-point comparisons were performed using Mann-Whitney tests for continuous variables and Chi-square test for categorical variables (noted \*).

BMI body mass index, HBP high blood pressure, ALP alkaline phosphatase, AST aspartate aminotransferase, ALT alanine aminotransferase, GGT gamma glutamyltransferase

| n=54                                             | Before RYGB  | 1-year post-RYGB | 5-years post-RYGB | 1-year vs baseline | 5-years vs baseline | 5-years vs 1-year |
|--------------------------------------------------|--------------|------------------|-------------------|--------------------|---------------------|-------------------|
| Body weight (kg)                                 | 123.5 ± 21.0 | 92.7 ± 17.3      | 94.7 ± 18.1       | <0.001             | <0.001              | 0.09              |
| BMI (kg/m <sup>2</sup> )                         | 45.7 ± 7.3   | 34.3 ± 6.1       | 35.0 ± 6.4        | <0.001             | <0.001              | 0.09              |
| <b>Body composition</b>                          |              |                  |                   |                    |                     |                   |
| Fat mass (%)                                     | 46.9 ± 5.0   | 38.8 ± 6.3       | 41.4 ± 6.0        | <0.001             | 0.005               | <0.001            |
| Fat-free mass (%)                                | 50.8 ± 4.9   | 58.2 ± 6.1       | 55.8 ± 5.8        | <0.001             | 0.006               | <0.001            |
| Trunk-fat mass (%)                               | 32.1 ± 6.9   | 18.8 ± 5.8       | 19.1 ± 5.1        | <0.001             | <0.001              | 0.13              |
| Android/Gynoid fat mass ratio                    | 2.4 ± 0.6    | 2.1 ± 0.5        | 2.0 ± 0.5         | 0.008              | 0.02                | 1.00              |
| <b>Diabetes condition</b>                        |              |                  |                   |                    |                     |                   |
| Number of anti-diabetic drugs                    | 2.6 ± 1      | 1.5 ± 1          | 1.5 ± 1.1         | <0.001             | <0.001              | 1.00              |
| Patients requiring Insulin - n (%)*              | 35 (65%)     | 19 (35%)         | 15 (28%)          | 0.002              | 0.001               | 0.40              |
| Fasting glycemia (mmol/L)                        | 8.8 ± 3.2    | 6.1 ± 1.4        | 7.9 ± 2.8         | <0.001             | 0.23                | <0.001            |
| HbA1C (%)                                        | 8.6 ± 1.9    | 6.6 ± 0.8        | 7.6 ± 1.2         | <0.001             | 0.002               | <0.001            |
| Patients with HbA1C <7% - n (%)*                 | 6 (11%)      | 34 (67%)         | 18 (34%)          | <0.001             | 0.005               | <0.001            |
| <b>Comorbidities</b>                             |              |                  |                   |                    |                     |                   |
| Patients taking anti-HBP drugs – n (%)*          | 47 (87%)     | 37 (69%)         | 32 (59%)          | 0.02               | 0.001               | 0.32              |
| Patients taking anti-Dyslipidemia drugs – n (%)* | 40 (74%)     | 15 (28%)         | 16 (30%)          | <0.001             | <0.001              | 1.00              |
| HDL-cholesterol (mmol/L)                         | 1.2 ± 0.3    | 1.4 ± 0.3        | 1.6 ± 0.6         | <0.001             | 0.05                | 0.57              |
| LDL-cholesterol (mmol/L)                         | 2.4 ± 0.7    | 2.5 ± 0.9        | 2.5 ± 1.0         | 0.41               | 0.84                | 1.00              |
| ALP (IU/L)                                       | 72.4 ± 18.1  | 82.5 ± 31.5      | 74.8 ± 17.1       | 0.17               | 0.59                | 0.61              |
| AST (IU/L)                                       | 30.1 ± 15.0  | 27.2 ± 7.8       | 24.8 ± 4.8        | 0.50               | 0.24                | 0.11              |
| ALT (IU/L)                                       | 35.9 ± 22.9  | 29.8 ± 14.2      | 27.1 ± 8.8        | 0.23               | 0.34                | 0.85              |
| GGT (IU/L)                                       | 54.1 ± 40.5  | 33.5 ± 46.7      | 20.5 ± 8.7        | 0.001              | 0.001               | 1.00              |



**Supplementary Figure S1. Study flow charts**

(A) Flow-chart of the test cohort, which includes 175 obese individuals with type 2 diabetes who underwent RYGB. (B) Flow-chart of the French validation cohort from Louis-Mourier hospital, including 54 obese individuals with type 2 diabetes who underwent RYGB as an external validation of the 5y-Ad-DiaRem.

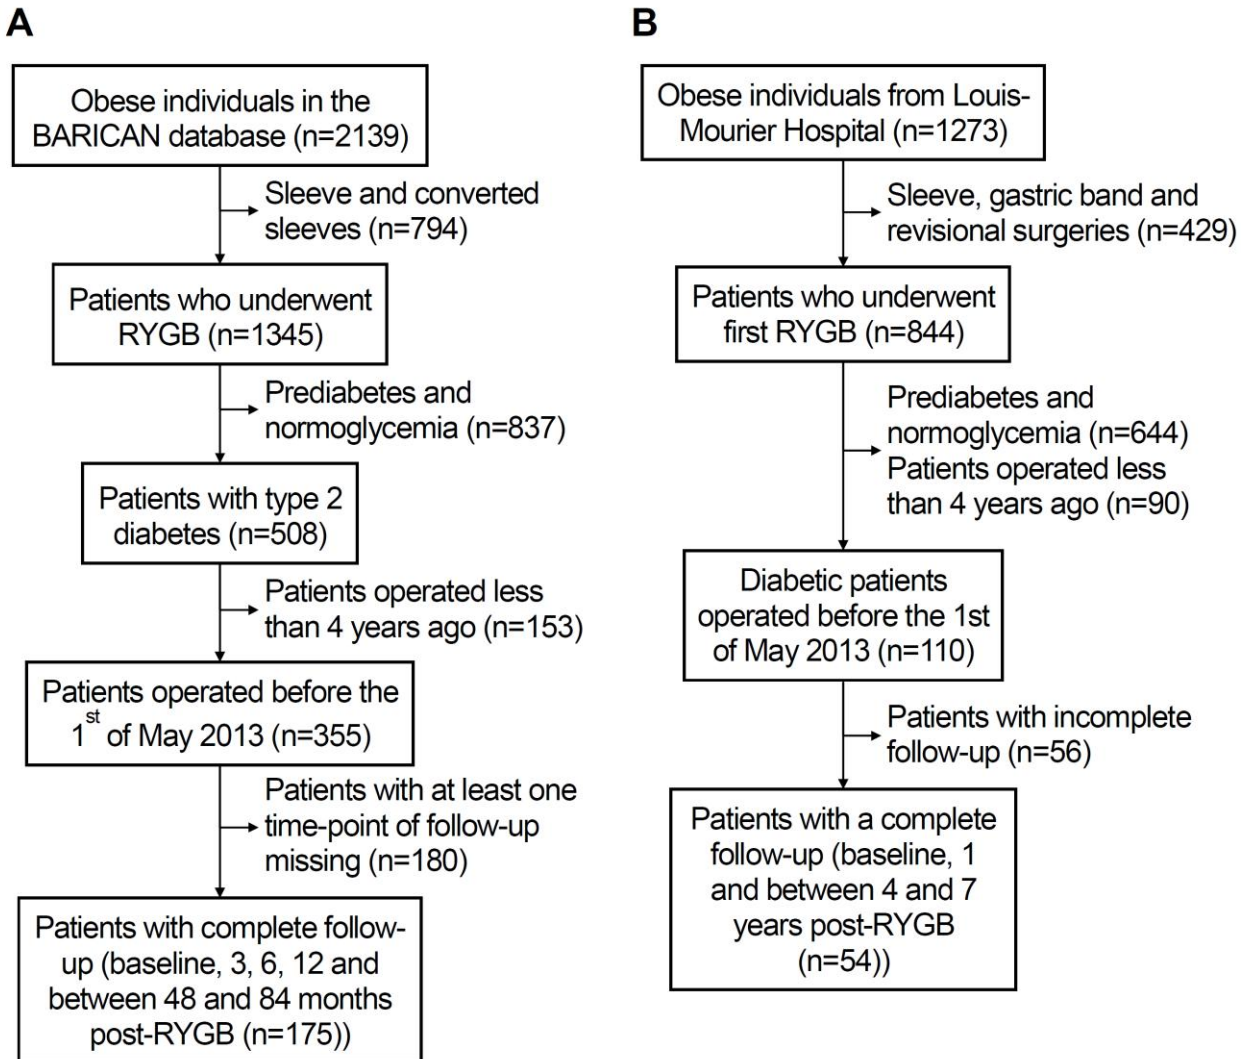

SUPPLEMENTARY DATA

**Supplementary Figure S2. Baseline psychotropic drugs usage in our test cohort (n=175)**

- A. Baseline prevalence of psychotropic drug usage
- B. Mean ± standard error of the total number of anti-psychotropic drugs taken by the treated patients

*In both panels, Green represents patients in 5-years diabetes remission, Orange, those who relapsed after a transient remission and Red, those who remained with T2D all along the post-RYGB follow-up.*

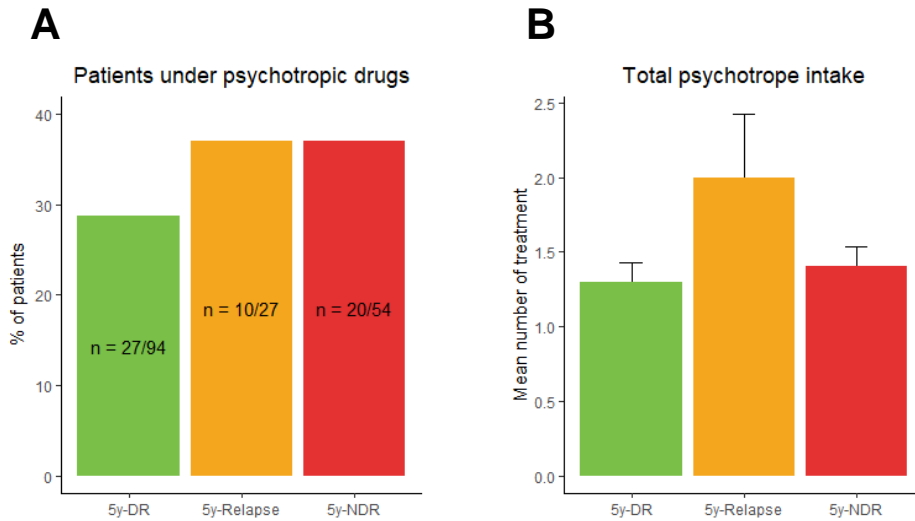

**Supplementary Figure S3. DiaRem patient’s distribution in the test cohort (n=175) and evolution of fat mass during the follow-up**

(A) Distribution of patients (n=175) in the test cohort according to their DiaRem score values.

(B) Patients’ IMS score values colored according to their 5-year remission status (BARICAN cohort, n=175). (B) Evolution of patient’s fat mass during the follow-up (determined via DXA)

*In both panels, Green represents patients in 5-years diabetes remission, Orange, those who relapsed after a transient remission and Red, those who remained with T2D all along the post-RYGB follow-up. In panel B, b means statistical difference (p<0.05) between 5y-DR and 5y-Relapse, and c between 5y-NDR and 5y-Relapse*

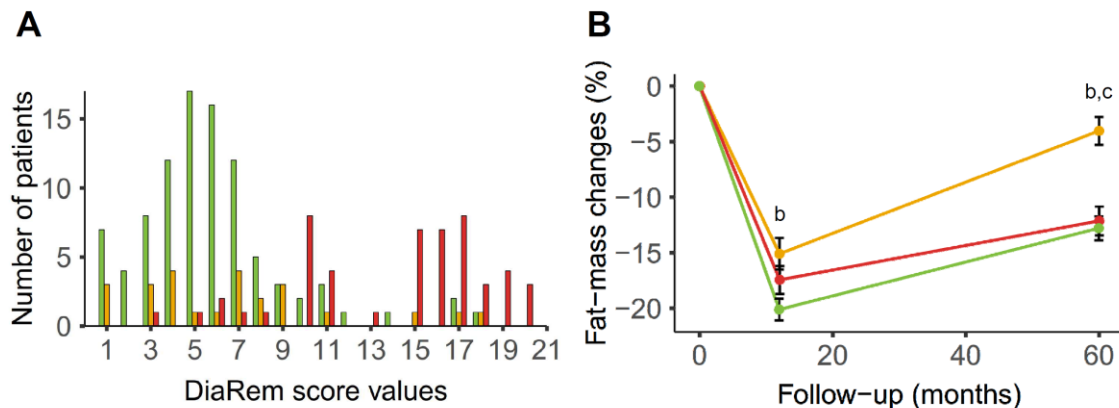

SUPPLEMENTARY DATA

**Supplementary Figure S4. Random forest analysis evaluating the impact of each item of the 5y-Ad-DiaRem in terms of long-term diabetes remission**

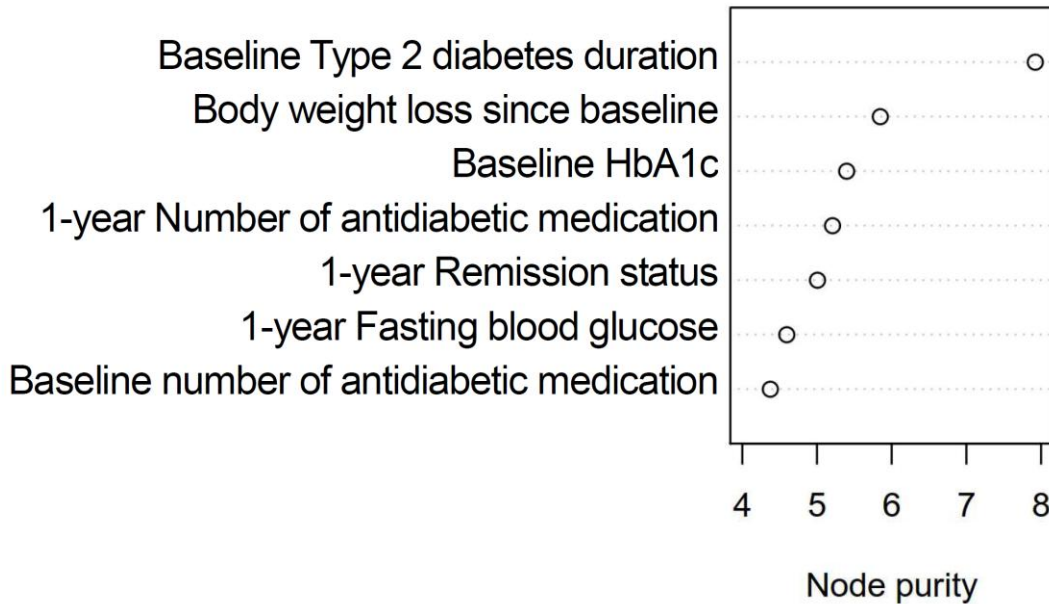

**Supplementary Figure S5. 5y-Ad-DiaRem patient’s distribution in our three confirmation cohorts.**

- A. Patient’s distribution in the French confirmation cohort (n=54)
- B. Patient’s distribution in the Italian confirmation cohort from (n=20)
- C. Patient’s distribution in the German confirmation cohort from (n=50)

*In all panels, Green represents patients in 5-years diabetes remission, Orange, those who relapsed after a transient remission and Red, those who remained with T2D all along the post-RYGB follow-up.*

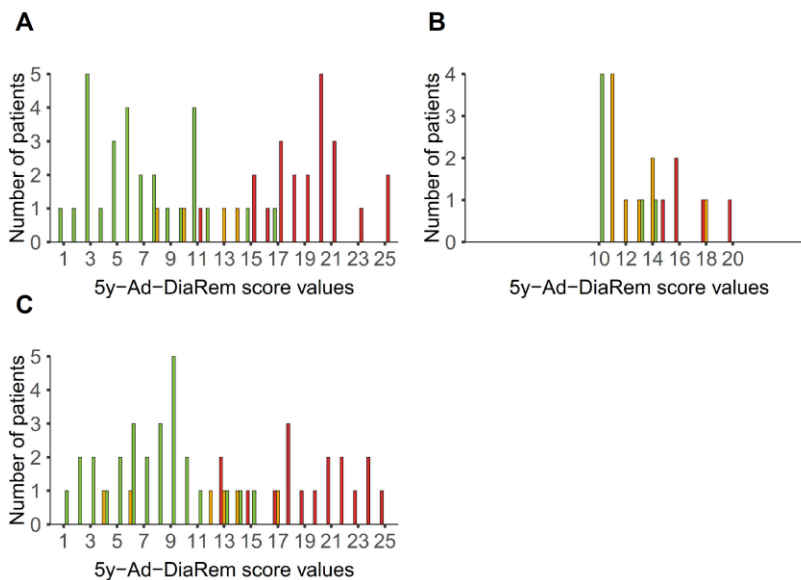

Supplement: dc180567supplementarydata.pdf [file dc180567supplementarydata.pdf]
